# Supplementary material
Source: PubMed Central journal article supplement (PMC5817613)
Supplement: jama-318-443-s001.pdf [file jama-318-443-s001.pdf]

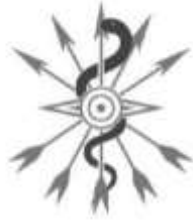

Fondation Ophtalmologique  
Adolphe de Rothschild

**INTERET DE L'ASPIRATION DISTALE PREMIERE DANS LA RECANALISATION  
PAR THROMBECTOMIE DANS L'INFARCTUS CEREBRAL**

**Endovascular revascularization with contact aspiration versus stent retriever in  
ischemic stroke with large vessel occlusion, the ASTER TRIAL: A Randomized  
Clinical Trial.**

**ASTER**

*PROTOCOLE DE RECHERCHE EN SOINS COURANTS*

**Code de la recherche: MPN\_2015\_22 Version n°1.1 du 24/07/2015**

|                                                                                                                                                                                                                                                                                                                                                                             |                                                                                                                                     |
|-----------------------------------------------------------------------------------------------------------------------------------------------------------------------------------------------------------------------------------------------------------------------------------------------------------------------------------------------------------------------------|-------------------------------------------------------------------------------------------------------------------------------------|
| <p>Promoteur<br/>Fondation Ophtalmologique Adolphe de Rothschild<br/>25 rue Manin, 75019 Paris</p> <p>Représenté par le Dr Laurence Salomon médecin<br/>coordonateur de l'Unité de Recherche Clinique Tel : 01 48<br/>03 64 31 Fax : 01 48 03 64 30<br/>lsalomon@fo-rothschild.fr</p>                                                                                       | <p>date : 24/07/2015</p> <p>signature<br/></p> |
| <p>Investigateur Coordonnateur</p> <p>Dr Michel PIOTIN<br/>Service de Radiologie Interventionnelle, Fondation<br/>Rothschild<br/>Tel : 01 48 03 68 29 mpiotin@fo-rothschild.fr</p> <p>Responsable scientifique<br/>Dr Bertrand LAPERGUE<br/>Service de Neurologie, Hôpital FOCH, 40, Rue Worth,<br/>92150 Suresnes<br/>Tel : 01 46 25 59 73 b.lapergue@hopital-foch.org</p> | <p>date : 24/07/2015</p> <p>signature<br/></p> |

15  
16  
17  
18  
19

The study protocol and the form of consent were approved by the CPP (Comité de Protection des Personnes) Ile de France VI, ID 2015-A00830-49,

## 20 **1. Scientific Rationale - Introduction**

21  
22

23 Mechanical thrombectomy (TM) has now been validated by 4 published randomized studies  
24 (Cf. MR CLEAN, 2014 ESCAPE, 2015, SWIFT PRIME, 2015, EXTEND IA, 2015). These studies have  
25 shown for the first time that mechanical thrombectomy is the reference treatment for cerebral infarction  
26 related to proximal cerebral occlusion and results in -35% of severe cerebral infarction disability and  
27 decreased mortality. All of these studies used stent retriever thrombectomy devices to achieve 58-72%  
28 recanalization (MR CLEAN, 2014 ESCAPE, 2015). This "recanalization" criterion is of major importance  
29 because it largely determines the functional prognosis of patients following cerebral infarction (Khatri,  
30 2014).

31 These results are exciting but we can do even better. Indeed, already new strategies of thrombectomy are  
32 available with a particular attraction for ADAPT (A Direct Aspiration first Pass Technic). This technique  
33 involves starting the thrombectomy procedure by direct aspiration of the thrombus, using a dedicated  
34 suction catheter. This technique provides a high level of endovascular navigability and allows high  
35 recanalization rates (> 90%), with low morbidity (Turk A, 2014 and Kowoll 2015). Indeed, if  
36 recanalization is not obtained with the aspiration catheter, the operator can deploy a stent retriever through  
37 the suction catheter, combining the interest of both techniques.

38

39 We first performed a comparative observational study between these two strategies among 244 patients in  
40 two centers (FOR, and Hôpital Foch) for cerebral infarction related to a proximal occlusion. This is, to  
41 date, the largest series of patients with ADAPT as a first line strategy. The complete recanalization rate  
42 was 84% with ADAPT versus 68% with a stent retriever (P = 0.006) (Unpublished data, Oral presentation  
43 at the European Stroke Organization, April 2015).

44 Our study aims to evaluate in a rigorous way whether the first-line aspiration during thrombectomy in the  
45 acute phase of cerebral infarction is of interest to patients in terms of immediate surgical success and  
46 prognosis for the patient. The aim is to determine the best thrombectomy strategy to reduce the stroke  
47 patient's disability. Indeed, recanalization of the occluded artery is the major prognostic factor associated  
48 with patient disability. Currently, stroke affects 1 patient every 4 minutes in France, with each year,  
49 approximately 130,000 new patients (prevalence estimated at nearly 800,000 patients, of which 500,000  
50 will have sequelae).

51 In 2004, cerebral infarction was the most costly pathology for the health care system in terms of average  
52 annual expenditure per patient and the total reimbursement per long-term condition (ALD). With  
53 endovascular therapy (mechanical thrombectomy), there are twice as many patients who can live  
54 independently after this type of stroke. A retrospective preliminary study suggests that the ADAPT  
55 thrombectomy system has a better cost-effectiveness ratio (Turk, AS, 2014).

## 56 **2. Objectives of the research**

### 57 2.1. Primary objective:

58 - To demonstrate the superiority of a first-line aspiration strategy (ADAPT) during cerebral  
59 thrombectomy, compared with first-line stent retriever use in cerebral infarction related to proximal  
60 occlusion

61

### 62 2.2. Secondary objectives:

63 - To compare, between these two strategies of thrombectomy:  
64 • the degree of recanalization at the end of the first treatment strategy

- 65 • the procedural delays
- 66 • the rate of intraoperative complications: perforation, dissection, subarachnoid hemorrhage, the
- 67 presence of erratic cerebral embolisms
- 68 • complications at the groin puncture
- 69 • the incidence rate of 24-hour cerebral hemorrhage • 3-month disability of patients
- 70 • the proportion of deaths at 3 months, related to cerebral infarction
- 71
- 72 - To compare the interest of the two strategies in subgroups of patients: according to the occlusion site
- 73 (average cerebral, internal carotid, tandem), depending on the length of the clot evaluated on the initial
- 74 imaging.
- 75
- 76 - To carry out a cost / effectiveness evaluation of the two strategies
- 77
- 78

### 79 **3. Population selection**

#### 80 3.1. Inclusion Criteria

- 81 - Age > 18 years
- 82 - Cerebral infarction of the anterior circulation (carotid termination in T or L, ACM1 or ACM2)
- 83 - Occlusion of the anterior circulation proved by imaging (angioCT or MRI)
- 84 - With or without prior intravenous thrombolysis
- 85 - Access to recanalization by endovascular treatment within 6 hours of symptom onset

#### 86 3.2. Criteria for non-inclusion

- 87 - Absence of indication or contraindication to thrombectomy - Association with a cerebral infarction of the
- 88 posterior circulation - Occlusion of the cervical carotid.
- 89 - Allergy to radiographic contrast products
- 90 - Patient dependent before stroke (modified Rankin score > 3)
- 91 - Known pregnancy, breastfeeding
- 92 - Person with legal protection
- 93 - Non-affiliation to a social security scheme
- 94 - Opposition of the patient or (in case of urgent inclusion) of his / her relatives

#### 95 3.3. Secondary exclusion criterion

- 96 - No access for catheterization

97

98

99

100

101

### 102 **4. Research Methodology**

103

104

#### 105 4.1. Design of the study

106

- 107 - Prospective, randomized, multicenter trial, controlled in two parallel groups

108

- 109 - Centralized 1: 1 randomization, stratified on the center, and on prior IV thrombolysis

110

- 111 - The assessment of the primary endpoint will be made by two independent neuroradiologists who will be unaware of the thrombectomy strategy.

112

- 113 - The protocol provides for the enrollment of patients in an emergency situation (L. 1122-1-1 and L.1122-1-2)

114

115

#### 116 4.2. Organization of the study

##### 117 Description of the endovascular strategies

118

119 According to the recommendations of the French Neurovascular Society, the medical strategy of management of acute proximal occlusions within 6 hours involves the following medical measures:

120

- 121 - hospitalization of the patient in a neurovascular unit

- 116 - treatment by IV thrombolysis if the patient is eligible
- 117 - initiation of medical products, acts, and methods to prevent or treat the worsening or recurrence of
- 118 cerebral ischemia
- 119 - the initiation of products, acts, and methods to prevent or treat general complications related to
- 120 decubitus or the neurological state of the patient.

121  
122 Currently, an increasing number of operators begin the thrombectomy procedure by frontline contact  
123 aspiration. This strategy makes it possible either to recanalize the occluded artery, or otherwise to mount a  
124 stent retriever (synergistic technique) through the suction catheter in case of failure of the aspiration.  
125 However, the effectiveness of this strategy has never been proved.

126 The common practice is therefore variable according to the operator, who can choose to use either  
127 aspiration (ADAPT technique) or the stent retriever. In case of failure or operational difficulty, operators  
128 can switch from one strategy to another.

129  
130 In the ASTER study, thrombectomy is planned for all patients included. Randomization will determine  
131 whether aspiration is used in the initial therapeutic strategy. Patients randomized to the ADAPT group will  
132 therefore undergo a first distal aspiration. Patients in the "stent retriever" group will not have this initial  
133 aspiration. The first aspiration thrombectomy procedure (ADAPT) or stent retriever procedure will be  
134 performed according to the recommendations of good practice (a maximum of 3 passes, if necessary,  
135 before concluding that the technique has failed, and use of a proximal occlusion balloon in the retriever  
136 stent arm).

137 The choice of adjuvant techniques will be left to the operator's discretion. This information will be  
138 collected in the FIU. In the event of failure, the rescue procedure is left to the operator's choice, with the  
139 aim of guaranteeing the patient the best chances of recanalization, and according to the usual practice of  
140 the center.

141  
142 The type of device used during thrombectomy will be the one routinely used in the center. The centers  
143 participating in the study are thus centers that routinely practice both types of technique. All devices used  
144 will be CE marked for this indication. The thrombectomy will be carried out by operators who meet the  
145 qualifications required for the accreditation of NRI exercise by HAS 2013, having experience in both  
146 techniques. Concurrent treatments for the use of these stents and the option of anesthesia (conscious  
147 sedation or general anesthesia) are the usual prescriptions for the routine management of these patients.

148  
149

#### 150 Population of the study

151 Patients hospitalized for suspicion of ischemic infarction secondary to an occlusion of the anterior  
152 circulation within 6 hours from stroke onset.

153 .

#### 154 Information and non-opposition to patient participation

155 After verification of the inclusion and non-inclusion criteria, the principal investigator or one of his / her  
156 collaborators (registered on the delegation of authority log) will explain to the patient the objectives and  
157 conduct of the study, using an information form and will seek non-opposition from the patient.

158 Most patients eligible for this research will not be in a state of consciousness allowing comprehension of  
159 this information; moreover, the inclusion will be carried out in an emergency context. If the state of  
160 consciousness of the patient does not allow this, and in view of the therapeutic urgency, the non-  
161 opposition of a relative (trusted person if it is present) will be sought so as not to delay the management of  
162 the patient. Otherwise, the physician will include the patient according to the inclusion protocol in  
163 emergency situations. Once the patient has regained a sufficient state of consciousness, his / her objection  
164 to further research and processing of the information collected will be sought.

165 The patient can leave the study at any time on request. Patients not complying with the protocol and  
166 patients lost to follow-up will not be excluded from the study.

167

#### 168 Randomization Procedure

169 After checking the inclusion and non-inclusion criteria and the patient's non-opposition, the randomization

170 will be done by computer server, the system automatically assigning the strategy group and the inclusion  
171 number. The inclusion will be effective after randomization. The patient will then be permanently assigned  
172 to the strategy in question.

173  
174

#### 175 4.3. Evaluation criteria

##### 176 Main Assessment Criterion

177 Comparison between the two thrombectomy strategies (randomization groups with first aspiration  
178 [ADAPT] or with stent retriever) of the percentage of patients with complete recanalization (final score  
179 TICI 2b-3, annex) at the end of angiography.

180

181 The assessment of the primary endpoint will be made by an independent evaluator blinded to the  
182 endovascular procedure.

183

184

##### 185 Secondary Criteria for Assessment

186 Comparison between the two strategies of thrombectomy (randomization groups with first aspiration  
187 [ADAPT] or with stent retriever: of

188 - The percentage of patients with complete recanalization (TICI score 2b-3) at the end of the first treatment  
189 strategy implemented

190 - the time between femoral puncture and the time of access to the clot

191 - the recanalization time (time between femoral puncture and the obtaining of a final score TICI  
192 2b-3)

193 - the occurrence of peri-operative complications: peri-procedural perforation, dissection

194 - the presence of erratic cerebral emboli

195 - the occurrence of complications at the puncture site

196 - the NIHSS (National Institute of Health Stroke Score) score

197 - the proportion of patients with a gain of 4 NIHSS points at 24h

198 - Modified Rankin score (appendix) at 3 months (favorable if mRS  $\leq$  2)

199 - the occurrence of intracranial hemorrhage (parenchymatous or subarachnoid) on cerebral imaging (CT or  
200 MRI according to the habits of the center) at 24 h (+/- 12 h) according to the ECASS2 classification

201 - the occurrence of symptomatic intracranial hemorrhage within the first 24 hours

202 - the occurrence of death within 3 months.

203

204 The medium-term evaluation will be carried out at 3 months +/- 15 days. It can be done by telephone if a  
205 follow-up visit is not planned as part of the care or if the patient cannot move. In all cases, the assessment  
206 will be made by a person not directly involved in the patient's care.

207

208 No specific radiological examination is required in the study. Examinations will be carried out according  
209 to the habits of the centers in the current management of this pathology. The imaging data (initial MRI or  
210 scanner, thrombectomy procedure, MRI or control scanner) will be evaluated centrally after the patient  
211 leaves the hospital, by independent experts, in the absence of treatment and clinical data.

212

213

214

#### 215 4.4. Study Withdrawal

216 The patient can leave the study at any time on request. Patients who refuse to participate in the  
217 study will be treated as usual. The included patients will not be able to participate simultaneously  
218 in another trial.

219

220 Research termination may be decided by the sponsor, in particular in the case of complications  
221 (after opinion of the Independent Safety Committee) or in the case of non-inclusion.

222

#### 223 4.5. Project feasibility

224

225 The investigating centers have a recruitment of patients admitted for thrombectomy superior to the  
 226 recruitment necessary for the study (data of activity on 2014).  
 227 All investigating centers perform thrombectomy in more than 40 patients per year and have  
 228 experience in both thrombectomy strategies (ADAPT and Stent retriever).  
 229 The two principal investigating centers are:  
 230 Dr. Michel PIOTIN, MD, PhD, Adolphe de Rothschild Ophthalmological Foundation, Paris  
 231 Dr. Bertrand LAPERGUE, MD, PhD, FOCH Hospital, Suresnes  
 232  
 233 The list of other investigating centers is being developed.

234  
 235 **4.6. Duration of participation and duration of study**

236 Total duration of study: 27 months  
 237 Inclusion period -: - 24 months  
 238 Duration of participation per patient: 3 months maximum  
 239

240 **4.7. Schedule of Events**  
 241

|                              | Inclusion (<6h) | Post thrombectomy | 24hr follow-up | 90d follow-up |
|------------------------------|-----------------|-------------------|----------------|---------------|
| Information                  | ✓               |                   | ✓              | ✓             |
| Non-opposition               | ✓               |                   | ✓              | ✓             |
| Randomization                | ✓               |                   |                |               |
| Clinical examination         | ✓               |                   |                | ✓             |
| mRS score                    | ✓               |                   |                | ✓             |
| NIH Stroke Scale             | ✓               |                   | ✓              |               |
| Radiological data            | ✓               | ✓                 | ✓              |               |
| Medications                  |                 | ✓                 |                |               |
| Complications/Adverse Events |                 | ✓                 | ✓              | ✓             |

242  
 243 **5. Data Management and Statistics**

244 **5.1. Data collection**

245 All data of the patients meeting the inclusion criteria will be collected anonymously. Patients will be  
 246 identified by a patient number corresponding to a center number, an inclusion number in the center  
 247 (chronological order) and the patient's initials (first letter of last and first name).  
 248 A nominative list of the patients enrolled in the study, with the corresponding patient number , will be kept  
 249 in each center, stored in the investigator binder, and will be destroyed 15 years after the end of the study.  
 250

251 The clinical variables from the patient record will be reported on an electronic case report form (eCRF) by  
 252 the principal investigator, one of his collaborators or a clinical study technician.

253 The imaging files will be anonymized, stored on a CD-ROM and collected for a centralized evaluation.  
 254

255 **5.2. Data analysis**

256 All the statistical analyses will be performed independently, by a statistician, blinded to the allocated arm,  
 257 of the Biostatistics Department of the CHRU of Lille under the responsibility of Professor A. Duhamel.  
 258 The software used will be SAS version 9.3 or later (SAS Institute Inc, Cary, NC, USA). All statistical tests

259 will be performed with a 2-tailed alpha risk of 5%. No interim analysis will be performed. A detailed  
260 statistical analysis plan will be written and finalized prior to the database lock.  
261 Baseline characteristics will be described for each arm. Quantitative variables will be presented using  
262 mean and standard deviation in cases of Gaussian distribution, or using the median and the interquartile  
263 range (i.e. 25th and 75th percentiles) otherwise. The normality of the distributions will be assessed  
264 graphically by histograms and using the Shapiro-Wilk test. Qualitative variables will be presented as the  
265 frequencies and percentages of each modality.  
266 Analyses will be conducted in intention to treat and per-protocol samples (deviations from the protocol  
267 will be defined in the detailed statistical analysis plan).

#### 268 269 Primary objective

270 The complete recanalization rate at the end of the thrombectomy procedure will be compared between the  
271 two arms using a Chi-Square test. The effect size for the ADAPT strategy (experimental arm) will be  
272 calculated in terms of absolute and relative rate difference (experimental arm vs. control) with their 95%  
273 confidence intervals. A stratified analysis on the center will be carried out to assess the center effect; the  
274 Breslow-Day test will be used to test the interaction between the center and the treatment effect.

#### 275 276 Secondary Objectives

277 The quantitative secondary endpoints will be compared between the two arms using the Student's t test or  
278 the Mann-Whitney U test in cases of a non-Gaussian distribution. The qualitative secondary endpoints will  
279 be compared between the two arms using the Chi-square test or the Fisher's exact test (in case of expected  
280 frequencies <5).

#### 281 282 283 5.3. Sample size calculation

284 The main objective is to show, in patients with cerebral infarction of the anterior circulation, the  
285 superiority of first distal aspiration (ADAPT, experimental arm) to increase the complete recanalization  
286 rate at the end of the thrombectomy procedure in comparison with the use of first-line stent retriever  
287 approach (control arm).

288 According to the literature, the complete recanalization rate after the use of a first-line stent retriever is  
289 estimated between 58% and 72% (MR CLEAN, 2014 ESCAPE, 2015). A retrospective study conducted at  
290 Foch and the Rothschild Foundation hospital found a complete recanalization rate of 70% with the use of  
291 first-line stent retriever ( $\pm$  the use of rescue thrombectomy) and a complete recanalization rate of 85% with  
292 the use of the ADAPT strategy ( $\pm$  the rescue thrombectomy) (unpublished data). In terms of effect size,  
293 this study showed an increase in the recanalization success rate by 21% with the ADAPT strategy. To  
294 demonstrate this effect size, with a two-sided test, an alpha risk of 5% and a power of 90%, 161 patients  
295 per arm (322 patients in total) are required.

296

## 297 **6. Regulatory information**

### 298 6.1. Distinction research and care

299 All the medical products, procedures and additional examinations required for the study are prescribed /  
300 performed within the framework of the usual care of the patients. No further follow-up visits are  
301 required for the study. The only difference with the routine practice is that the choice of an initial  
302 aspiration at the beginning of the thrombectomy procedure is conditioned by the randomization and not  
303 by the habits of the center and / or the operator.

### 304 305 6.2. Safety evaluation

#### 306 Description of Safety Assessment Parameters

307

308 Within the framework of a trial evaluating routine care, all medical acts or strategies which are the  
309 subject of this study are part of usual practice and are used in accordance with their indications. Any  
310 potential adverse events are those associated with the patient's usual care (care-related).

311

312

313 An Independent Oversight Committee (ISC) will be established to ensure the balance of complication rates

314 between each strategy. Data will be blinded to the randomization group (group A and group B).  
315 The CSI will meet on a regular basis throughout the study, on its own initiative or at the request of the  
316 proponent. It will include Professor Emmanuel Touze, CHU of Caen, Professor Mikael Mazighi, CHU  
317 Lariboisière, and Doctor Olivier Detante, CHU Grenoble.

318

319

#### 320 Managing unwanted events

321

322 These are events that may occur during the study period. Monitoring these adverse effects is part of the  
323 routine practice within each center.

324 The events observed in the study will be recorded as they occur in the clinical research file, in order to be  
325 presented to the CSI.

326

327 The declaration of serious adverse events related to medical devices and administration of medicines must  
328 follow the usual reporting circuit provided by the regulations in force in healthcare institutions, with a  
329 copy to the study sponsor (by fax to the clinical research unit on 01 48 03 64 30).

330

#### 331 6.3. Access to data and privacy

332 During and after the trial, the data collected and transmitted to the sponsor by the investigators (or any  
333 other collaborators in the research) will be codified. In no case, the names of the persons concerned, their  
334 address or any other information enabling a direct identification, will be visible.

335

336

#### 337 6.4. Quality control and quality assurance

338 The conduct of the trial in the investigating centers and the management of the subjects will be done in  
339 accordance with the Helsinki Declaration and the current Good Clinical Practices.

340 The investigators of each center undertake to receive representatives of the sponsor for quality control and  
341 compliance visits, as appropriate.

342

#### 343 Instructions for data collection

344 All information required by the protocol must be recorded on the electronic clinical research file. These  
345 data must be collected and recorded as they are obtained and explicitly recorded in the clinical research  
346 file . Any missing data should be coded.

347

348 The investigator is responsible for the accuracy, quality and relevance of all data entered.

349

#### 350 Quality control

351 The investigator shall make the documents and individual data strictly necessary for the monitoring,  
352 quality control and audit of this research available to the persons responsible for quality control and duly  
353 mandated by the sponsor for this purpose.

354 The person (s) mandated by the sponsor will visit each center on a regular basis once the trial has been set  
355 up, one or several times during the course of the research, according to the rhythm of the inclusions and at  
356 the end of the trial. During these visits, the following elements will be reviewed:

357

- 358 - protection and safety of persons,
- 359 - compliance with the research protocol, the procedures defined therein and the regulatory texts in force,
- 360 - quality of data collected in the observation booklet: accuracy, missing data, consistency of data with  
361 source documents (medical records, appointment books, originals of laboratory results, etc.)
- 362 - management of possible products and biological sampling.

362 Any visit will give rise to a written monitoring report.

363

364

365

366



## 367 Audit

368 An audit can be carried out at any time by persons mandated by the sponsor and independent of the  
369 researchers. Its objective is to ensure the quality of the trial, the validity of its results and the respect of the  
370 law and the current regulations. The persons who direct and supervise the research agree to comply with  
371 the requirements of the sponsor and of the competent authority with respect to a research audit or  
372 inspection. The audit can be applied at all stages of the trial, from the development of the protocol to the  
373 publication of the results and the classification of the data used or produced during the research.

374

## 375 6.5. Legal and ethical considerations

376 The Rothschild Ophthalmological Foundation will be the sponsor of this research in routine care, and its  
377 clinical research unit (URC) will be responsible for regulatory missions.

378 Before starting the trial, each investigator will provide the sponsor's representative with a copy of his / her  
379 dated and signed personal CV with his / her registration number to the physician's order or RPPS number.

380

## 381 Request for Committee for the Protection of Persons (CPP) approval

382 This research will be submitted to the Paris Ile de France VI CPP, without which it cannot begin. This will  
383 be notified in the information form.

384

## 385 Substantial amendment to the protocol

386 The Coordinator will inform the proponent of any proposed amendments to the protocol. Substantial  
387 changes will be submitted by the proponent to the PPC for opinion.

388

## 389 CNIL declaration

390 This research is subject to the law n ° 78-17 of 6 January 1978 relating to data processing, computer files  
391 and freedoms. Therefore, the management of directly or indirectly identifying data collected in this  
392 research is subject to the referral to the National Commission of Informatics and Liberties (CNIL).

393

## 394 Information note

395 A written document, submitted to the committee for the protection of persons, will be explained and given  
396 to patients. As part of research to evaluate routine care, individuals have the ability to oppose their  
397 participation in research. This is stated in the information form. The information given to the persons and  
398 their absence of opposition must be notified and dated in their medical file. In case of opposition, the  
399 patient will benefit from the strategy proposed to him. Upon completion of this research, the researcher  
400 may be informed of its overall results in accordance with the terms and conditions specified in the research  
401 document. Information relating to the rights of persons participating in this research (right of access and  
402 rectification, right to object to the transmission of data subject to professional secrecy which may be used  
403 in the course of this research) shall be incorporated into the information note for the patient.

404

## 405 6.6. Final Research Report

406 The final research report will be co-authored by the co-investigators and the biostatistician for this  
407 research. This report will be submitted to each of the investigators for opinion. Once consensus has been  
408 reached, the final version must be endorsed by the signature of each investigator and sent to the sponsor as  
409 soon as possible after the actual completion of the research. A report drawn up in accordance with the  
410 competent authority's reference plan shall be transmitted to the competent authority and to the CPP within  
411 one year after the end of the search (ie last visit of follow up of the last patient enrolled). This period will  
412 be extended to 90 days in the event of premature termination of the trial.

413

## 414 6.7. Data processing and document retention

415 The data will be collected by the investigator on an electronic clinical research file. In accordance with the  
416 applicable laws and regulations, in particular articles L.1121-3 and R.5121-13 of the Public Health Code,  
417 persons with direct access to data, (for example, investigators, persons responsible for quality control and  
418 all persons required to collaborate in the tests) shall take all necessary precautions to ensure the

419 confidentiality of information relating to experimental treatments, tests, persons who lend themselves to it,  
420 in particular as regards their identity and the results obtained. The data collected by these persons during  
421 the quality control or audits are then made anonymous.

422

423 Documents and data relating to this research will be archived at the end of the trial by the investigator and  
424 the sponsor for a period of 15 years after the end of the study. This indexed archive includes:

425 - Copies of the mandatory CPP notice

426 - The successive versions of the protocol (identified by the version number and version date),

427 - Correspondence letters with the sponsor,

428 - The paper version of the completed and validated observation booklet of each subject included,  
429 authenticated (dated and signed) by the investigator

430 - All appendices specific to the study,

431 - The final report of the study from the statistical analysis and the quality control of the study (with copy to  
432 the sponsor).

433 - Possible audit certificates carried out during the research

434 - The database which gave rise to the statistical analysis must also be archived by the analyst (paper or  
435 computer).

436

## 437 6.8. Insurance and Scientific Commitment

438

439 Insofar as research is well qualified as routine care research by the requested CPP, which means no  
440 additional risk associated with the study, the insurance will be that of the institution responsible for care  
441 (Article L. 1142-2).

442

443 Each investigator will undertake to comply with the obligations of the law and conduct the research  
444 according to the B.P.C., in accordance with the terms of the Helsinki Declaration in force. To do so, a  
445 copy of the scientific commitment dated and signed by the principal investigator of the participating center  
446 will be given to the proponent's representative.

447

## 448 6.9. Rules for Publication

449 Persons who have actually participated in the development of the protocol, its conduct and the drafting of  
450 the results will be signatories to the publications.

451 The Rothschild Ophthalmological Foundation will be mentioned as the sponsor of this research.

452 Financial support will be mentioned.

453

## 454 7. Références bibliographiques

455

456 Berkhemer OA, Fransen PS, Beumer D, van den Berg LA, Lingsma HF, Yoo AJ, Schonewille WJ, Vos JA,  
457 Nederkoorn PJ, Wermer MJ, van Walderveen MA, Staals J, Hofmeijer J, van Oostayen JA, Lycklama à Nijeholt  
458 GJ, Boiten J, Brouwer PA, Emmer BJ, de Bruijn SF, van Dijk LC, Kappelle LJ, Lo RH, van Dijk EJ, de Vries J,  
459 de Kort PL, van Rooij WJ, van den Berg JS, van Hasselt BA, Aerden LA, Dallinga RJ, Visser. A randomized  
460 trial of intraarterial treatment for acute ischemic stroke. *N Engl J Med.* 2015 Jan 1;372(1):11-20.

461

462 Goyal M, Demchuk AM, Menon BK, Eesa M, Rempel JL, Thornton J, Roy D, Jovin TG, Willinsky RA,  
463 Sapkota BL, Dowlatshahi D, Frei DF, Kamal NR, Montanera WJ, Poppe AY, Ryckborst KJ, Silver FL, Shuaib  
464 A, Tampieri D, Williams D, Bang OY, Baxter BW, Burns PA, Choe H, Heo JH, Holmstedt CA, Jankowitz B,  
465 Kelly M, Linares G, Mandzia JL, Shankar J, Sohn SI, Swartz RH, Barber PA, Coutts SB, Smith EE, Morrish  
466 WF. Randomized assessment of rapid endovascular treatment of ischemic stroke. *N Engl J Med.* 2015 Mar  
467 12;372(11):1019-30.

468

469 Saver JL, Goyal M, Bonafe A, Diener HC, Levy EI, Pereira VM, Albers GW, Cognard C, Cohen DJ, Hacke W,  
470 Jansen O, Jovin TG, Mattle HP, Nogueira RG, Siddiqui AH, Yavagal DR, Baxter BW, Devlin TG, Lopes DK,  
471 Reddy VK, de Rochemont RD, Singer OC, Jahan R; SWIFT PRIME Investigators. Stent-Retriever Thrombectomy  
472 after Intravenous t-PA vs. t-PA Alone in Stroke. *N Engl J Med.* 2015 Apr 17. [Epub ahead of print].

473

474 Campbell BC, Mitchell PJ, Kleinig TJ, Dewey HM, Churilov L, Yassi N, Yan B, Dowling RJ, Parsons MW,  
475 Oxley TJ, Wu TY, Brooks M, Simpson MA, Miteff F, Levi CR, Krause M, Harrington TJ, Faulder KC, Steinfort  
476 BS, Priglinger M, Ang T, Scroop R, Barber PA, McGuinness B, Wijeratne T, Phan TG, Chong W, Chandra RV,  
477 Bladin CF, Badve M, Rice H, de Villiers L, Ma H, Desmond PM, Donnan GA, Davis SM; EXTEND-IA  
478 Investigators. Endovascular therapy for ischemic stroke with perfusion-imaging selection. *N Engl J Med.* 2015 Mar  
479 12;372(11):1009-18.

480

481 Khatri P, Yeatts SD, Mazighi M, Broderick JP, Liebeskind DS, Demchuk AM, Amarenco P, Carrozzella J,  
482 Spilker J, Foster LD, Goyal M, Hill MD, Palesch  
483 YY, Jauch EC, Haley EC, Vagal A, Tomsick TA, IMS III Trialists Time to angiographic reperfusion and clinical  
484 outcome after acute ischaemic stroke: an analysis of data from the Interventional Management of Stroke (IMS  
485 III) phase 3 trial. *Lancet Neurol.* 2014 Jun;13(6):567-74.

486

487 Turk AS, Frei D, Fiorella D, Mocco J, Baxter B, Siddiqui A, Spiotta A, Mokin M, Dewan M, Quarfordt S,  
488 Battenhouse H, Turner R, Chaudry I. ADAPT FAST study: a direct aspiration first pass technique for acute  
489 stroke thrombectomy. *J Neurointerv Surg.* 2014 May;6(4):260-4.

490

491 Blanc R, Fahed R, Redjem H, Bartolini B, Pistocchi S, Pötin M Single Center Experience with the ADAPT  
492 Technique for Acute Ischemic Stroke. *J Neurointerv Surg.* 2014 Jul;6 Suppl 1:A37.

493

494

495 **8. Annexes**

496

497

498 ***Classification TICI (Thrombolysis in Cerebral Infarction)***

499

500

| <b>Score</b> | <b>Revised TICI</b>                                                                                                                                                                                                  |
|--------------|----------------------------------------------------------------------------------------------------------------------------------------------------------------------------------------------------------------------|
| <b>0</b>     | No perfusion or anterograde flow beyond site of occlusion                                                                                                                                                            |
| <b>1</b>     | Penetration but not perfusion. Contrast penetration exists past the initial obstruction but with minimal filling of the normal territory                                                                             |
| <b>2</b>     | Incomplete perfusion wherein the contrast passes the occlusion and opacifies the distal arterial bed but rate of entry or clearance from the bed is slower or incomplete when compared with non-involved territories |
| <b>2A</b>    | Some perfusion with distal branch filling of <50% of territory visualized                                                                                                                                            |
| <b>2B</b>    | Substantial perfusion with distal branch filling of $\geq$ 50% of territory visualized                                                                                                                               |
| <b>2C</b>    | Near-complete perfusion except for slow flow in a few distal cortical vessels or presence of small distal cortical emboli                                                                                            |
| <b>3</b>     | Complete perfusion with normal filling of all distal branches                                                                                                                                                        |

501

502

503

504

505 *Score de Rankin modifié (mRS)*

506

507

|   |                                                                                   |                                                                                                                        |
|---|-----------------------------------------------------------------------------------|------------------------------------------------------------------------------------------------------------------------|
| 0 | Aucun symptôme                                                                    | No symptoms.                                                                                                           |
| 1 | Pas d'incapacité en dehors des symptômes : activités et autonomie conservées      | No significant disability. Able to carry out all usual activities, despite some symptoms.                              |
| 2 | Handicap faible : incapacité d'assurer les activités habituelles mais autonomie   | Slight disability. Able to look after own affairs without assistance, but unable to carry out all previous activities. |
| 3 | Handicap modérée : besoin d'aide mais marche possible sans assistance             | Moderate disability. Requires some help, but able to walk unassisted.                                                  |
| 4 | Handicap modérément sévère : marche et gestes quotidiens impossibles sans aide    | Moderately severe disability. Unable to attend to own bodily needs without assistance, and unable to walk unassisted.  |
| 5 | Handicap majeur : alitement permanent, incontinence et soins de nursing permanent | Severe disability. Requires constant nursing care and attention, bedridden, incontinent.                               |
| 6 | Décès                                                                             | Dead.                                                                                                                  |

508

509

510

511

512

513

514

515

516

517

518

519

520

521

522

523

524

525

526

527

528

529

530

531

532

533

534

535  
536  
537  
538  
539  
540  
541  
542

NIHSS score: stroke severity assessment

[http://www.google.fr/url?sa=t&rc=tj&q=&esrc=s&source=web&cd=1&ved=0ahUKEwi84uzE0uDUAhUEXR0KHcu4AaMQFggjMAA&url=http%3A%2F%2Fwww.strokecenter.org%2Fwp-content%2Fuploads%2F2011%2F08%2FNIH\\_Stroke\\_Scale.pdf&usg=AFQjCNH0vj8ik0Rtu4Ssm3y2so1jawR7hA](http://www.google.fr/url?sa=t&rc=tj&q=&esrc=s&source=web&cd=1&ved=0ahUKEwi84uzE0uDUAhUEXR0KHcu4AaMQFggjMAA&url=http%3A%2F%2Fwww.strokecenter.org%2Fwp-content%2Fuploads%2F2011%2F08%2FNIH_Stroke_Scale.pdf&usg=AFQjCNH0vj8ik0Rtu4Ssm3y2so1jawR7hA)

| Item | Intitulé                                           | cotation                                                                                                                                                                                                                                                                                                                                                                                                                                                                                              | score        |   |
|------|----------------------------------------------------|-------------------------------------------------------------------------------------------------------------------------------------------------------------------------------------------------------------------------------------------------------------------------------------------------------------------------------------------------------------------------------------------------------------------------------------------------------------------------------------------------------|--------------|---|
| 1a   | vigilance                                          | 0 vigilance normale, réactions vives<br>1 trouble léger de la vigilance : obnubilation, éveil plus ou moins adapté aux stimulations environnantes<br>2 coma ; réactions adaptées aux stimulations nociceptives<br>3 coma grave : réponse stéréotypée ou aucune réponse motrice                                                                                                                                                                                                                        |              |   |
| 1b   | orientation (mois, âge)                            | 0 deux réponses exactes<br>1 une seule bonne réponse<br>2 pas de bonne réponse                                                                                                                                                                                                                                                                                                                                                                                                                        |              |   |
| 1c   | commandes (ouverture des yeux, ouverture du poing) | 0 deux ordres effectués<br>1 un seul ordre effectué<br>2 aucun ordre effectué                                                                                                                                                                                                                                                                                                                                                                                                                         |              |   |
| 2    | oculomotricité                                     | 0 oculomotricité normale<br>1 ophthalmoplégie partielle ou déviation réductible du regard<br>2 ophthalmoplégie horizontale complète ou déviation forcée du regard                                                                                                                                                                                                                                                                                                                                     |              |   |
| 3    | champ visuel                                       | 0 champ visuel normal<br>1 quadranopsie latérale homonyme ou hémianopsie incomplète ou négligence visuelle unilatérale<br>2 hémianopsie latérale homonyme franche<br>3 cécité bilatérale ou coma (1=3)                                                                                                                                                                                                                                                                                                |              |   |
| 4    | paralysie faciale                                  | 0 motricité faciale normale<br>1 asymétrie faciale modérée (paralysie faciale unilatérale incomplète)<br>2 paralysie faciale unilatérale centrale franche<br>3 paralysie faciale périphérique ou diplégie faciale                                                                                                                                                                                                                                                                                     |              |   |
| 5    | motricité membre supérieur                         | 0 pas de déficit moteur proximal<br>1 affaissement dans les 10 secondes, mais sans atteindre le plan du lit.<br>2 effort contre la pesanteur, mais le membre chute dans les 10 secondes sur le plan du lit.<br>3 pas d'effort contre la pesanteur (le membre chute mais le patient peut réaliser une contraction musculaire avec ou sans mouvement du membre.)<br>4 absence de mouvement (coter 4 si le patient ne fait aucun mouvement volontaire)<br>X cotation impossible (amputation, arthrodèse) | Dt           | G |
| 6    | motricité membre inférieur                         | 0 pas de déficit moteur proximal<br>1 affaissement dans les 5 secondes, mais sans atteindre le plan du lit.<br>2 effort contre la pesanteur, mais le membre chute dans les 5 secondes sur le plan du lit.<br>3 pas d'effort contre la pesanteur (le membre chute mais le patient peut faire un mouvement tel qu'une flexion de hanche ou une adduction.)<br>4 absence de mouvement (le patient ne fait aucun mouvement volontaire)<br>X cotation impossible (amputation, arthrodèse)                  | Dt           | G |
| 7    | ataxie                                             | 0 ataxie absente<br>1 ataxie présente pour 1 membre<br>2 ataxie présente pour 2 membres ou plus                                                                                                                                                                                                                                                                                                                                                                                                       |              |   |
| 8    | sensibilité                                        | 0 sensibilité normale<br>1 hypoesthésie minime à modérée<br>2 hypoesthésie sévère ou anesthésie                                                                                                                                                                                                                                                                                                                                                                                                       |              |   |
| 9    | langage                                            | 0 pas d'aphasie<br>1 aphasie discrète à modérée : communication informative<br>2 aphasie sévère<br>3 mutisme ; aphasie totale                                                                                                                                                                                                                                                                                                                                                                         |              |   |
| 10   | dysarthrie                                         | 0 normal<br>1 dysarthrie discrète à modérée<br>2 dysarthrie sévère<br>X cotation impossible                                                                                                                                                                                                                                                                                                                                                                                                           |              |   |
| 11   | extinction, négligence                             | 0 absence d'extinction et de négligence<br>1 extinction dans une seule modalité, visuelle ou sensitive, ou négligence partielle auditive, spatiale ou personnelle.<br>2 négligence sévère ou anosognosie ou extinction portant sur plus d'une modalité sensorielle                                                                                                                                                                                                                                    |              |   |
|      |                                                    |                                                                                                                                                                                                                                                                                                                                                                                                                                                                                                       | <b>TOTAL</b> |   |

543
